# Supplementary material for: Hierarchical ZnO microarchitectures assembled by ultrathin nanosheets: hydrothermal synthesis and enhanced photocatalytic activity
Source: Royal Society of Chemistry journal article supplement (doi:10.1039/c0jm03390a), 2011-01-01
Supplement: c0jm03390a.pdf [file c0jm03390a.pdf]

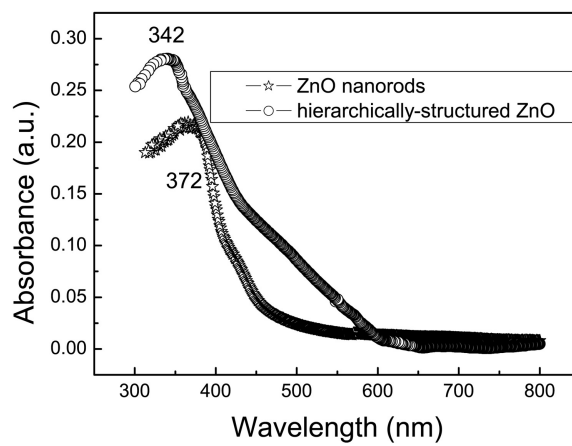

Figure S1 (Supplementary Information)

Figure S1 : UV-visible absorption spectra of the prepared ZHMs and ZnO nanorods.
